# Supplementary material for: Synthesis, characterization and investigation of synergistic antibacterial activity and cell viability of silver–sulfur doped graphene quantum dot (Ag@S-GQDs) nanocomposites
Source: Royal Society of Chemistry journal article supplement (doi:10.1039/c9tb02823d), 2020-01-01
Supplement: c9tb02823d1.pdf [file c9tb02823d1.pdf]

## Supporting information

### Synthesis, characterization and investigation of synergistic antibacterial activity and cell viability of silver-sulfur doped graphene quantum dots (Ag@S-GQDs) nanocomposite

Sachin Kadian<sup>1</sup>, Gaurav Manik<sup>1,\*</sup>, Neeladrisingha Das<sup>3</sup>, Poonam Nehra<sup>2</sup>, Rishi Pal Chauhan<sup>2</sup> and Partha Roy<sup>3</sup>

<sup>1</sup>Department of Polymer and Process Engineering, Indian Institute of Technology Roorkee, Uttarakhand, India

<sup>2</sup>Department of Physics, National Institute of Technology Kurukshetra, Haryana, India

<sup>3</sup>Department of Biotechnology, Indian Institute of Technology Roorkee, Uttarakhand, India

First author e-mail id: [skadian@pe.iitr.ac.in](mailto:skadian@pe.iitr.ac.in), [sachinkadian68@gmail.com](mailto:sachinkadian68@gmail.com)

\*Corresponding author e-mail id: [manikfpt@iitr.ac.in](mailto:manikfpt@iitr.ac.in), [gauravmanik3m@gmail.com](mailto:gauravmanik3m@gmail.com)

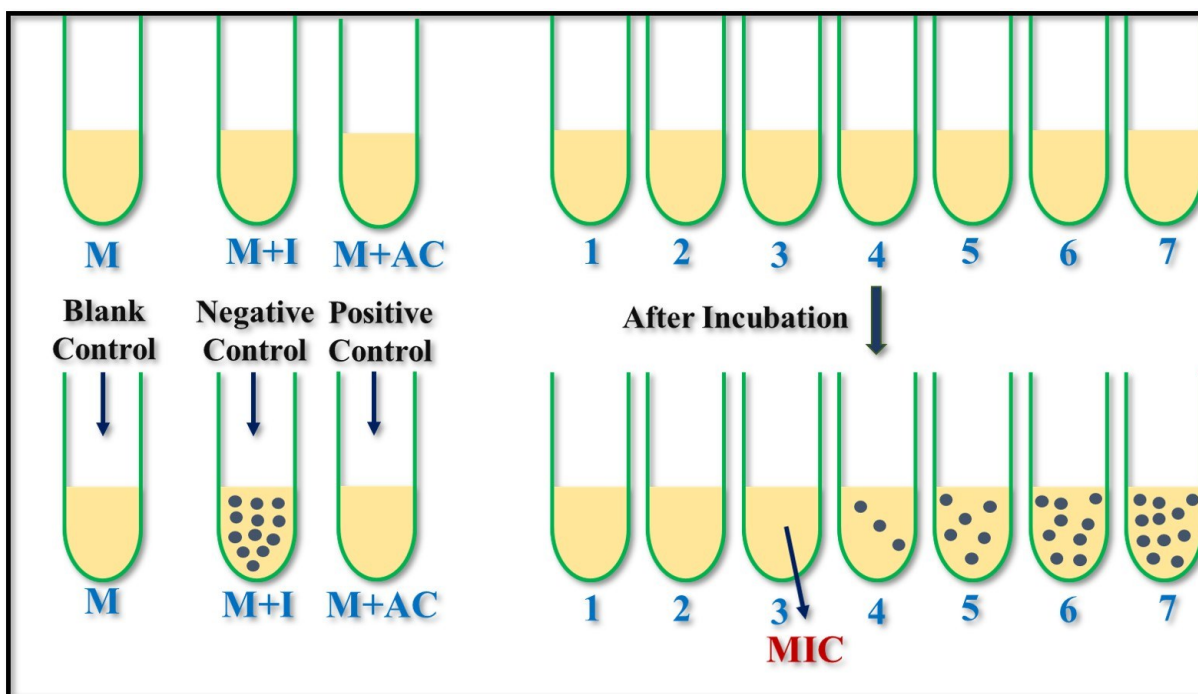

Scheme S1: Schematic illustration of MIC calculation through macrodilution method.

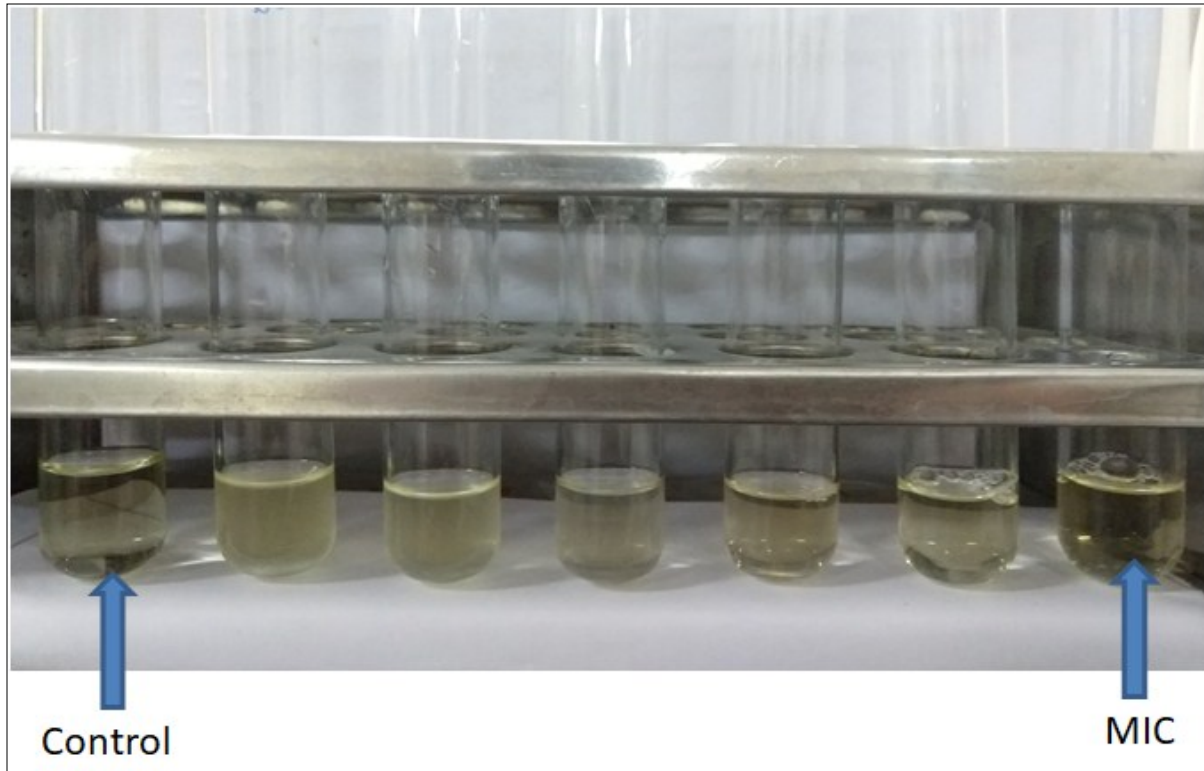

15

16 **Figure S1: Real-time image of experimental set-up of MIC calculation through**  
17 **macrodilution method.**

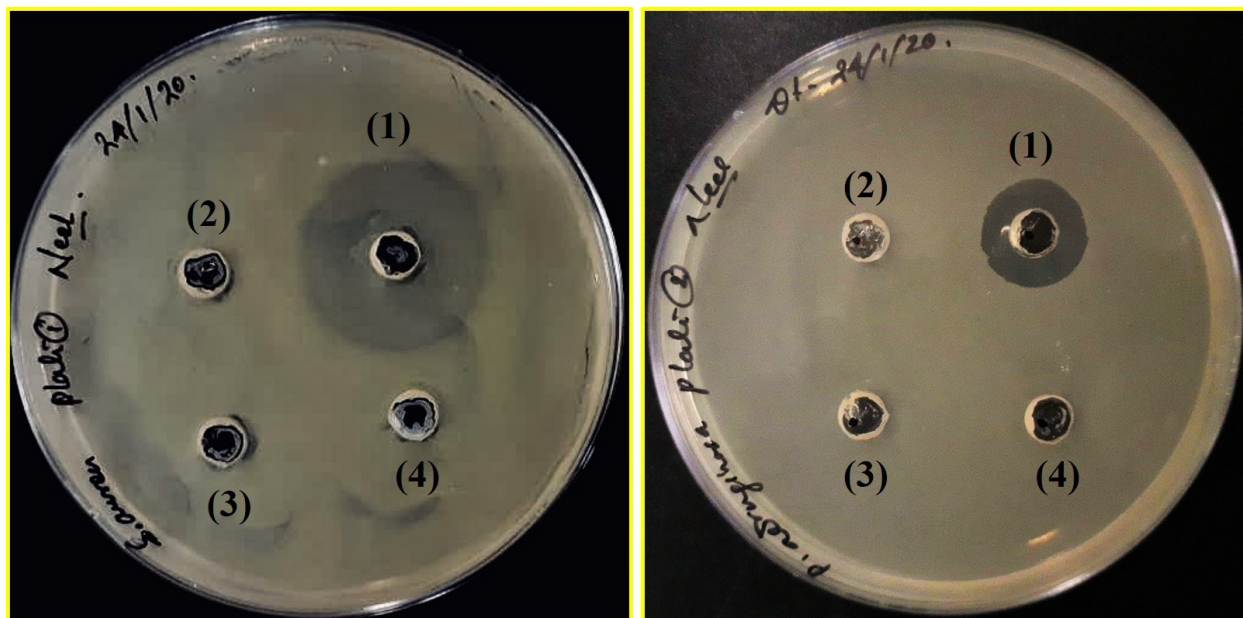

(a)

(b)

18

19 Figure S2: Zone of inhibition produced by Ag@S-GQDs nanocomposite (1), AgNPs (2),  
 20 S-GQDs (3) and negative control (4) against (a) *Staphylococcus aureus* and (b) *Pseudomonas*  
 21 *aeruginosa* bacterial strain.
